# Supplementary material for: Overview of the Role of Cell Wall DUF642 Proteins in Plant Development
Source: Int J Mol Sci. 2019 Jul 6;20(13):3333. doi: 10.3390/ijms20133333 (PMC6651502; doi:10.3390/ijms20133333)
Supplement: Supplementary file 1 [file ijms-20-03333-s001.zip › Supplemental_tablesV5.xlsx]

## Sheet: S_Table 1
Table S1. Transcriptomic evidence of DUF642 genes expression during specific developmental stages and/or in response to diverse environmental stimuli. DUF642 genes are grouped by clades as reported by Vázquez-Lobo et al. (2012) and using the locus tag of Arabidopsis as a reference for gene grouping. A brief description of the experimental conditions and the tissues/organs in which the transcript …
Clade	DUF642 gene	Species	Expressed in tissue/organ	Regulation	Experimental conditions	Reference
A1	At1g80240	Arabidopsis	embryo	embryo-specific expression during germination	Col-0 seeds in continuous light	[67]
A1	At1g80240	Arabidopsis	seed	down-regulation in after-ripened/non dormant seeds in comparison to dormant/freshly collected seeds	after-ripened and dormant Cvi-0, Ler-0, aba1-1 and abi-1-1 seeds germinated in continuous light	[68]
A1	At1g80240	Arabidopsis	3-day old seedling	up-regulated during seed development, maturation and germination	Ws-0 seeds in standard growth conditions	[69]
A1	At4g32460	Arabidopsis	endosperm (seed development, 4 DAP)	up-regulation by IAA, down-regulation by ABA and JA	Col-0 plants grown in standard conditions	[33]
A1	At4g32460	Arabidopsis	ovule, developing seed, seedling	up-regulated during seed development, maturation and germination	Ws seeds in standard growth conditions	[69]
A1	orthologous to At4g32460	Hordeum vulgare	embryo	down-regulation during seed development	flowering plants grown in controlled light (16/8h) and temperature (20/18 ºC) conditions during 25 days	[70]
A1	At4g32460	Arabidopsis	stigmatic papillar cells	down-regulation in the genetically-ablated papillae in comparison with the WT	C24-0 and transgenic plants expressing 𝜓SRK::DT-A for cellular-specific ablation	[71]
A1	orthologous to At4g32460	Hordeum vulgare	embryo	up-regulation during germination	seeds germinated in controlled light (16/8h) and temperature (17/12 ºC) conditions	[70]
A1	At4g32460	Arabidopsis	endosperm	up-regulation in the micropylar endosperm during germination	Col-0 seeds in continuous light	[67]
A1	At4g32460	Arabidopsis	radicle	progressive up-regulation during germination	Cvi-0 seeds with/without after-ripening	[72]
A1	At4g32460	Arabidopsis	seed	up-regulation in response to exogenous GA during germination	Ler-0 seeds germinated in continuous light	[22]
A1	At4g32460	Arabidopsis	seed	up-regulation during seed germination	Col-0 seeds in continuous light	[13]
A1	At4g32460	Arabidopsis	seed	up-regulation in after-ripened/non dormant seeds in comparison to dormant/freshly collected seeds	after-ripened and dormant Cvi-0, Ler-0, aba1-1 and abi-1-1 seeds germinated in continuous light	[68]
A1	At5g11420	Arabidopsis	developing embryo (globular stage)	down regulation in the ground tissue precursor cell type with respect to other cell types	Col seeds with a two-component transgenic labelling system for cell-type-specific nuclei sorting (INTACT)	[73]
A1	orthologous to At5g11420	Hordeum vulgare	embryo	up-regulation during seed development (later stages)	flowering plants grown in controlled light (16/8h) and temperature (20/18 ºC) conditions during 25 days	[70]
A1	At5g11420	Arabidopsis	endosperm	up-regulation in the micropylar endosperm during germination	Col-0 seeds in continuous light	[67]
A1	orthologous to At5g11420	Hordeum vulgare	endosperm/aleurone	down-regulation during seed development	flowering plants grown in controlled light (16/8h) and temperature (20/18 ºC) conditions during 25 days	[70]
A1	At5g11420	Arabidopsis	seed	up-regulation during seed development	Col-0 seeds in continuous light vs dataset from Le et al. 2010	[67]
A1	orthologous to At5g11420	Hordeum vulgare	endosperm/aleurone	up-regulation during germination	seeds germinated in controlled light (16/8h) and temperature (17/12 ºC) conditions	[70]
A1	At5g11420	Arabidopsis	radicle	progressive up-regulation during germination	Cvi-0 seeds with/without after-ripening	[67]
A1	At5g11420	Arabidopsis	seed	up-regulation in after-ripened seeds vs dormant seeds	CVi-0 seeds with/without after-ripening	[74]
A1	At5g11420	Arabidopsis	seed	down-regulation in mutants with reduced redox buffering capacity	Col-0 and vtc2-4 dry/imbibed seeds	[75]
A1	At5g11420	Arabidopsis	seed	up-regulation in after-ripened/non dormant seeds in comparison to dormant/freshly collected seeds	after-ripened and dormant Cvi-0, Ler-0, aba1-1 and abi-1-1 seeds germinated in continuous light	[68]
A1	At5g11420	Arabidopsis	seed	upregulated by Karrikins	WT Ler and ga1-3 seeds imbibed for 24h in 1 μM KAR1	[76]
A1	At5g25460	Arabidopsis	seed	upregulated by Karrikins	WT Ler and ga1-3 seeds imbibed for 24h in 1 μM KAR1	[76]
A1	At5g25460	Arabidopsis	seed	up-regulation in after-ripened seeds vs dormant seeds	CVi-0 seeds with/without after-ripening	[74]
A1	At5g25460	Arabidopsis	seed	up-regulation in after-ripened/non dormant seeds in comparison to dormant/freshly collected seeds	after-ripened and dormant Cvi-0, Ler-0, aba1-1 and abi-1-1 seeds germinated in continuous light	[68]
A2	At2g41800	Arabidopsis	developing embryo (16-Cell and globular stage)	down regulation in the ground tissue precursor cell type with respect to the 16-C stage. Down regulation in the suspensor as the globular stage progresses	Col seeds with a two-component transgenic labelling system for cell-type-specific nuclei sorting (INTACT)	[73]
A2	At2g41800	Arabidopsis	stigmatic papillar cells	down-regulation in the genetically-ablated papillae in comparison with WT	C24-0 and transgenic plants expressing 𝜓SRK::DT-A for cellular-specific ablation	[71]
A2	At2g41800	Arabidopsis	radicle-specific	progressive up-regulation in the radicle during germination	Cvi seeds with/without after-ripening	[72]
A2	At2g41800	Arabidopsis	radicle-specific	up-regulation during germination	Col-0 seeds in continuous light	[67]
A2	At2g41800	Arabidopsis	seed	up-regulation in response to exogenous GA during germination	Ler-0 seeds germinated in continuous light	[22]
A2	At2g41800	Arabidopsis	seed	up-regulation in after-ripened/non dormant seeds in comparison to dormant/freshly collected seeds	after-ripened and dormant Cvi-0, Ler-0, aba1-1 and abi-1-1 seeds germinated in continuous light	[68]
A2	At2g41810	Arabidopsis	radicle	progressive up-regulation during germination	Cvi seeds with/without after-ripening	[72]
A2	At3g08030	Arabidopsis	embryo	expressed marker of the pre-cotyledon stage	Col-0 seeds in standard conditions	[77]
A2	At3g08030	Arabidopsis	radicle	progressive up-regulation during germination	Cvi seeds with/without after-ripening	[72]
A2	At3g08030	Arabidopsis	endosperm	up-regulation in the micropylar endosperm during germination	Col-0 seeds in continuous light	[67]
A2	At3g08030	Arabidopsis	seed	up-regulation in after-ripened seeds vs dormant seeds	CVi-0 seeds with/without after-ripening	[74]
A2	At3g08030	Arabidopsis	seed	up-regulation in response to priming in control and seeds subjected to accelerated ageing	Col-0 seeds in standard conditions	[36]
A2	orthologous to At3g08030	Ceiba aesculifolia	seed	up-regulation in response to priming treatment	seeds buried in soil in a tropical deciduous forest for a month	[36]
A2	orthologous to At3g08030	Wigandia urens	seed	up-regulation in response to priming treatment	seeds buried in soil in a temperate deciduous forest for 4 months	[36]
A2	orthologous to At3g08030	Brassica oleracea	seed	up-regulation during seed germination	seeds germinated in accordance to the International Seed Testing Association (ISTA) specifications	[35]
A2	At3g08030	Arabidopsis	seed	up-regulation in after-ripened/non dormant seeds in comparison to dormant/freshly collected seeds	after-ripened and dormant Cvi-0, Ler-0, aba1-1 and abi-1-1 seeds germinated in continuous light	[47]
A2	POPTR_0001s27110	Populus x canadensis clone	root	down-regulation in response to high Zn concentrations	1-month old wood cuttings subjected to Zn treatments for 21 days, under controlled light (16/8h) and temperature (23/18 ºC)	[58]
B	orthologous to At1g29980	Hordeum vulgare	embryo	up-regulation during seed development	flowering plants grown in controlled light (16/8h) and temperature (20/18 ºC) conditions during 25 days	[70]
B	orthologous to At1g29980	Hordeum vulgare	embryo	down-regulation during seed germination	seeds germinated in controlled light (16/8h) and temperature (17/12 ºC) conditions	[70]
B	At1g29980	Arabidopsis	radicle	progressive up-regulation during germination	Cvi-0 seeds with/without after-ripening	[72]
B	At1g29980	Arabidopsis	seed	up-regulation in after-ripened seeds vs dormant seeds	CVi-0 seeds with/without after-ripening	[74]
B	At1g29980	Arabidopsis	seed	up-regulation in after-ripened/non dormant seeds in comparison to dormant/freshly collected seeds	after-ripened and dormant Cvi-0, Ler-0, aba1-1 and abi-1-1 seeds germinated in continuous light	[68]
B	At2g34510	Arabidopsis	embryo-specific	up-regulation during germination	Col-0 seeds in continuous light	[67]
D	At5g14150	Arabidopsis	embryo-specific	up-regulation during germination	Col-0 seeds in continuous light	[67]

## Sheet: S_Table 2
Table S2. Transcriptomic evidence of DUF642 genes expression in response to diverse environmental stimuli. DUF642 genes are grouped by clades as reported by Vázquez-Lobo et al. (2012) and using the locus tag of Arabidopsis as a reference for gene grouping. A brief description of the experimental conditions and the tissues/organs in which the transcript was detected is included. Standard growth co…
Clade	DUF642 gene	Species	Expressed in tissue/organ	Regulation	Experimental conditions	Reference
A1	At1g80240	Arabidopsis	hypocotyl	up-regulation in response to low R/FR ratio	Col-0 seedlings exposed to low R/FR for 0 to 180 min.	[20]
A1	At1g80240	Arabidopsis	leaves	up-regulation in response to L-Galactono-1-4-lactone	Col-0 detached leaves incubated with 5 mM D-Glu, L-Gal, L-GalL or AsA for 10 h in the light	[17]
A1	At1g80240	Arabidopsis	shoot (pre-bolting)	up-regulation in response to darkness + flooding in all ecotypes	8 accessions with different sensibility to flooding	[78]
A1	At1g80240	Arabidopsis	shoot	down-regulation in transgenic lines with reduced resistance to fungal infection vs control plants	14-day old Col-0 and transgenic line expressing a fungal ferulic acid esterase grown in standard conditions	[79]
A1	At4g32460	Arabidopsis	cotyledons and hypocotyl	up-regulation in response to low R/FR ratio	Col-0 seedlings exposed to low R/FR for 0 to 180 min.	[20]
A1	othologous to At4g32460	Brassica rapa	hypocotyl	up-regulation in response to shade	4-day old white light-grown plants treated with 9h of a shade treatment	[21]
A1	At4g32460	Arabidopsis	hypocotyl	up-regulation in response to shade	5-day old white light-grown Col-0 plants treated with 4h of a shade treatment	[21]
A1	At4g32460	Arabidopsis	leaves	down-regulation in response to D-Glucose, L-Galactose, L-Galactono-1-4-lactone or Ascorbic Acid	Col-0 detached leaves incubated with 5 mM D-Glu, L-Gal, L-GalL or AsA for 10 h in the light	[17]
A1	At4g32460	Arabidopsis	leaves	up-regulation in response to drought + fungal infection	4-5-week old Col-0 plants subjected to sequential biotic and abiotic stress	[51]
A1	At4g32460	Arabidopsis	leaves	up-regulation in response to infection/drought + herbivory	4-5-week old Col-0 plants subjected to sequential biotic and abiotic stress	[51]
A1	At4g32460	Arabidopsis	leaves	up-regulation in response to infection+ drought	4-5-week old Col-0 plants subjected to sequential biotic and abiotic stress	[51]
A1	RknMes02_00171	Manihot esculenta	root	up-regulation in response to a histone deacetylase inhibitor (SAHA)	7-day old plants grown in liquid MS media with 100 μM suberoylanilide hydroxamic acid (SAHA) for 24h	[63]
A1	RknMes02_00171	Manihot esculenta	root	up-regulation in response to NaCl in plants with enhanced resistance to salt stress	7-day old plants pretreated with SAHA and subjected to saline stress during 24h	[63]
A1	At4g32460	Arabidopsis	shoot (pre-bolting)	up-regulation in response to darkness + flooding in all ecotypes	8 accessions with different sensibility to flooding	[78]
A1	At5g11420	Arabidopsis	leaves	down-regulation in response to D-Glucose, L-Galactose, L-Galactono-1-4-lactone or Ascorbic Acid	Col-0 detached leaves incubated with 5 mM D-Glu, L-Gal, L-GalL or AsA for 10 h in the light	[17]
A1	At5g11420	Arabidopsis	leaves	down-regulation in response to fungal infection	4-5-week old Col-0 plants subjected to sequential biotic and abiotic stress	[51]
A1	At5g11420	Arabidopsis	leaves	transient up and down-regulation over time in response to herbivory and infection + herbivory	4-5-week old Col-0 plants subjected to sequential biotic and abiotic stress	[51]
A1	At5g11420	Arabidopsis	leaves	down-regulation in response to drought and infection/herbivory + drought	4-5-week old Col-0 plants subjected to sequential biotic and abiotic stress	[51]
A1	Eucgr.C02812	Eucalyptus calmadulensis	leaves	down-regulation in response to drought	seedlings subjected to water deficit for two months	[66]
A1	At5g11420	Arabidopsis	aerial tissues	up-regulation in response to drought	20-day old Col-0 plants subjected to progressive drought	[64]
A1	At5g11420	Arabidopsis	root	up-regulation in response to combined Pi starvation and salt stress	plants of 330 accessions subjected to a combined treatment of Pi starvation and salt stress	[80]
A1	RknMes0200443	Manihot esculenta	root	up-regulation in response to a histone deacetylase inhibitor (SAHA)	7-day old plants grown in liquid MS media with 100 μM suberoylanilide hydroxamic acid (SAHA) for 24h	[63]
A1	orthologous to Os04g0494900	Stylosanthes guianensis cv. Reyan 2	root	up-regulation in response to aluminum stress	30-day old seedlings subjected to increasing AlCl3 treatments	[69]
A1	Os04g41750	Oryza sativa cv indica IR64	roots	up-regulation in response to Al stress in the Al-sensitive lines (genetic background)	5-day old seedlings from 4 genotypes subjected to a 4h Al treatment	[56]
A1	At5g25460	Arabidopsis	cotyledons	up-regulation in response to low R/FR ratio	Col-0 seedlings exposed to low R/FR for 0 to 180 min.	[20]
A1	orthologous to At5g25460	Brassica rapa	hypocotyl	up-regulation in response to shade	4-day old white light-grown plants treated with 9h of a shade treatment	[21]
A1	At5g25460	Arabidopsis	hypocotyl	up-regulation in response to shade	5-day old white light-grown Col-0 plants treated with 4h of a shade treatment	[21]
A1	At5g25460	Arabidopsis	hypocotyl	up-regulation in response to shade	5-day old white light-grown axr3-1 (auxin insensitive) plants treated with 4h of a shade treatment	[21]
A1	At5g25460	Arabidopsis	leaves	up-regulation in response to L-Galactono-1-4-lactone	Col-0 detached leaves incubated with 5 mM D-Glu, L-Gal, L-GalL or AsA for 10 h in the light	[17]
A1	orthologous to At5g25460	Plantago lanceolata	leaves	up-regulation by increased CO2 levels	3-week old plants from two contrasting populations subjected to simulated ambient and increased CO2 concentrations	[81]
A1	At5g25460	Arabidopsis	leaves	down-regulation in response to fungal infection	4-5-week old Col-0 plants subjected to sequential biotic and abiotic stress	[51]
A1	At5g25460	Arabidopsis	leaves	up-regulation in response to herbivory and herbivory + infection/drought	4-5-week old Col-0 plants subjected to sequential biotic and abiotic stress	[51]
A1	At5g25460	Arabidopsis	leaves	down-regulation in response to drought and drought + infection/herbivory	4-5-week old Col-0 plants subjected to sequential biotic and abiotic stress	[51]
A1	At5g25460	Arabidopsis	shoot (pre-bolting)	up-regulation in response to darkness + flooding in all ecotypes	8 accessions with different sensibility to flooding	[78]
A1	AhDGR2	Amaranthus hypochondriacus var. Revancha	leaves/roots	transient up-regulation in response to exogenous ABA	5-6-week old plants grown in controlled light (16/8h) and temperature (28ºC) conditions	[16]
A1	AhDGR2	Amaranthus hypochondriacus var. Revancha	leaves/roots	transient up-regulation in response to drought	5-6-week old plants grown in controlled light and temperature conditions, subjected to water deficit stress during 8 days	[16]
A1	AhDGR2	Amaranthus hypochondriacus var. Revancha	leaves/roots	progressive up-regulation in response to salt stress	5-6-week old plants grown in controlled light and temperature conditions, subjected to acute NaCl stress during 8 days	[16]
A1	At5g25460	Arabidopsis	roots	down-regulation in response to bacterial infection	4-week old Col-0 plants grown in standard conditions	[45]
A1	orthologous to At5g25460	Citrus cinensis	root	up-regulation in Al resistant plants in response to Al stress	6-week old seedlings of 2 Citrus species with different sensitivity to Al subjected to Al stress during 18 weeks	[58]
A2	At2g41800	Arabidopsis	leaves	down-regulation in response to L-Galactose, L-Galactono-1-4-lactone or Ascorbic Acid	Col-0 detached leaves incubated with 5 mM D-Glu, L-Gal, L-GalL or AsA for 10 h in the light	[17]
A2	At2g41800	Arabidopsis	leaves	down-regulation in response to drought + fungal infection	4-5-week old Col-0 plants subjected to sequential biotic and abiotic stress	[51]
A2	At2g41800	Arabidopsis	leaves	up-regulation in response to herbivory	4-5-week old Col-0 plants subjected to sequential biotic and abiotic stress	[51]
A2	At2g41800	Arabidopsis	leaves	down-regulation in response to drought and drought + infection/herbivory	4-5-week old Col-0 plants subjected to sequential biotic and abiotic stress	[51]
A2	At2g41800	Arabidopsis	shoot (pre-bolting)	down-regulation in response to darkness + flooding in all ecotypes	8 accessions with different sensibility to flooding	[78]
A2	At2g41800	Arabidopsis	root (pre-bolting)	down-regulation in response to darkness + flooding in all ecotypes	8 accessions with different sensibility to flooding	[78]
A2	orthologous to At2g41800	Prunus persica	fruit mesocarp	down-regulation in response to heat	mature fruit stored at 39 ºC and 90% relative humidity for 3 days	[29]
A2	At2g41810	Arabidopsis	leaves	up-regulation in response to herbivory and infection/drought + herbivory	4-5-week old Col-0 plants subjected to sequential biotic and abiotic stress	[51]
A2	At2g41810	Arabidopsis	root	up-regulation in response to saline stress	3-week old Col-0 plants subjected to 100 mM NaCl for 27h and 12/12 h light/dark photoperiod	[82]
A2	At3g08030	Arabidopsis	hypocotyl	up-regulation in response to low R/FR ratio	Col-0 seedlings exposed to low R/FR for 0 to 180 min.	[20]
A2	orthologous to At3g08030	Brassica rapa	hypocotyl epidermal cells	up-regulation in response to shade	4-day old white light-grown plants treated with 9h of a shade treatment	[21]
A2	At3g08030	Arabidopsis	base of the inflorescence stacks	up-regulation in response to bacterial infection	Plants with 2-5cm inflorescence stack, collected at 2, 4, 6 and 8 days post infection	[47]
A2	At3g08030	Brassica oleracea	seed	up-regulation in response to osmopriming	seeds subjected to osmopriming in PEG6000 solution at an osmotic potential of 21.0 Mpa and 20 ºC for 7 days	[35]
A2	At3g08030	Arabidopsis	shoot apical meristem	up-regulation in response to bacterial infection	16-day old C24 plants collected at 7, 14 and 24 days post-infection	[46]
A2	At3g08030	Arabidopsis	leaves	down-regulation in response to fungal infection	4-5-week old Col-0 plants subjected to sequential biotic and abiotic stress	[51]
A2	At3g08030	Arabidopsis	leaves	up-regulation in response to herbivory	4-5-week old Col-0 plants subjected to sequential biotic and abiotic stress	[51]
A2	At3g08030	Arabidopsis	leaves	down-regulation in response to herbivory + drought and infection + drought	4-5-week old Col-0 plants subjected to sequential biotic and abiotic stress	[51]
A2	At3g08030	Arabidopsis	root (pre-bolting)	down-regulation in response to darkness + flooding in all ecotypes	8 accessions with different sensibility to flooding	[78]
B	At1g29980	Arabidopsis	cotyledons	up-regulation in response to low R/FR ratio	Col-0 seedlings exposed to low R/FR for 0 to 180 min.	[20]
B	At1g29980	Arabidopsis	shoot apical meristem	up-regulation in response to bacterial infection	16-day old C24 plants collected at 7, 14 and 24 days post-infection	[46]
B	At1g29980	Arabidopsis	leaves	up-regulation in response to drought + fungal infection	4-5-week old Col-0 plants subjected to sequential biotic and abiotic stress	[51]
B	At1g29980	Arabidopsis	leaves	up-regulation in response to herbivory and drought/infection + herbivory	4-5-week old Col-0 plants subjected to sequential biotic and abiotic stress	[51]
B	At1g29980	Arabidopsis	leaves	up-regulation in response to herbivory + drought	4-5-week old Col-0 plants subjected to sequential biotic and abiotic stress	[51]
B	At1g29980	Arabidopsis	shoot (pre-bolting)	down-regulation in response to darkness + flooding in all ecotypes	8 accessions with different sensibility to flooding	[78]
B	At1g29980	Arabidopsis	root	up-regulation in response to infection with knot root nematodes	Col-0 seedlings subjected to nematode infection during 3 days	[52]
B	At1g29980	Arabidopsis	root (pre-bolting)	down-regulation in response to darkness and flooding in all ecotypes	8 accessions with different sensibility to flooding	[78]
B	At2g34510	Arabidopsis	hypocotyl	up-regulation in response to low R/FR ratio	Col-0 seedlings exposed to low R/FR for 0 to 180 min.	[20]
B	At2g34510	Arabidopsis	leaves	up-regulation in response to drought + fungal infection	4-5-week old Col-0 plants subjected to sequential biotic and abiotic stress	[51]
B	At2g34510	Arabidopsis	leaves	up-regulation in response to herbivory and drought/infection + herbivory	4-5-week old Col-0 plants subjected to sequential biotic and abiotic stress	[51]
B	At2g34510	Arabidopsis	leaves	up-regulation in response to drought + fungal infection	4-5-week old Col-0 plants subjected to sequential biotic and abiotic stress	[51]
B	At2g34510	Arabidopsis	leaves	down-regulation in response to drought	4-5-week old Col-0 plants subjected to sequential biotic and abiotic stress	[51]
B	At2g34510	Arabidopsis	leaves	up-regulation in response to drought	17 spring and winter accessions subjected to progressive drought stress	[65]
B	At2g34510	Arabidopsis	aerial tissues	up-regulation in response to drought	20-day old Col-0 plants subjected to progressive drought	[65]
D	At5g14150	Arabidopsis	shoot (pre-bolting)	down-regulation in response to darkness + flooding in all ecotypes	8 accessions with different sensibility to flooding	[78]
D	orthologous to At5g14150	Brassica rapa	hypocotyl	up-regulation in response to shade	4-day old white light-grown plants treated with 9h of a shade treatment	[21]
